# Supplementary material for: Genome sequence and rapid evolution of the rice pathogen Xanthomonas oryzae pv. oryzae PXO99A
Source: Springer Nature journal article supplement (doi:10.1186/1471-2164-9-204), 2008-01-01
Supplement: Additional file 1 [file 1471-2164-9-204-s1.pdf]

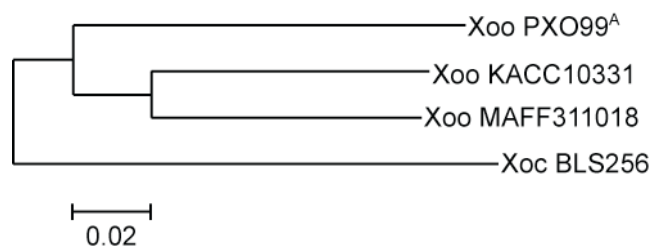

**Supplementary Figure 1.** Phylogenetic relationships among *X. oryzae* pv. *oryzae* (Xoo) strains PXO99<sup>A</sup>, KACC10331, and MAFF311018, and *X. oryzae* pv. *oryzicola* (Xoc) strain BLS256 based on whole genome alignment generated using MAUVE 2.1.1. The tree is rooted to BLS256.
